# Supplementary material for: Resveratrol Liposomes for Buccal Formulations: Suitability for Chemoprevention and Treatment of Oral Cancer
Source: Preprints.org preprint supplement (doi:10.20944/preprints202312.1039.v1), 2023-12-14
Supplement: Supplementary file 1 [file supplementary]

Table S1

| Linearity: correlation coefficient (*r*) | 0.999 |
| --- | --- |
| Range (mg/ml) | 5.0-200.0 |
| Calibration equation | y = 37204.1x – 2356.8 |
| Intra-day precision CV (%) range | 2.1-1.3 |
| Inter-day precision CV (%) range | 3.4-1.9 |
| Accuracy (%) + SD | 100.2±1.4 |
| Stability at room temperature for 24 h (CV%) | 2.3 |
